# Supplementary material for: Zn(II)-Based Mixed-Ligand-Bearing Coordination Polymers as Multi-Responsive Fluorescent Sensors for Detecting Dichromate, Iodide, Nitenpyram, and Imidacloprid
Source: MDPI journal article supplement (doi:10.3390/polym15112570), 2023-06-02
Supplement: s1 [file s1]

# Zn(II)-Based Mixed-Ligand-Bearing Coordination Polymers as Multi-Responsive Fluorescent Sensors for Detecting Dichromate, Iodide, Nitenpyram, and Imidacloprid

Dan Wang <sup>1</sup>, Lin-Huan Du <sup>1</sup>, Long Li <sup>1</sup>, Yu-Meng Wei <sup>1</sup>, Tao Wang <sup>1</sup>, Jun Cheng <sup>1</sup>, Bin Du <sup>2</sup>, Yi Jia <sup>3</sup> and Bao-Yi Yu <sup>1,\*</sup>

<sup>1</sup> Key Laboratory of Urban Agriculture in North China, Ministry of Agriculture and Rural Affairs, Beijing University of Agriculture, Beijing 102206, China; 202130123127@bua.edu.cn (D.W.); 202120151031@bua.edu.cn (L.-H.D.); 202020152122@bua.edu.cn (Y.-M.W.); 202220151161@bua.edu.cn (T.W.); chengjun@bua.edu.cn (J.C.)

<sup>2</sup> Beijing Key Laboratory of Agricultural Product Detection and Control of Spoilage Organisms and Pesticide Residue, Faculty of Food Science and Engineering, Beijing University of Agriculture, Beijing 102206, China; bindu80@bua.edu.cn

<sup>3</sup> Beijing National Laboratory for Molecular Sciences, CAS Key Lab of Colloid, Interface and Chemical Thermodynamics, Institute of Chemistry, Chinese Academy of Sciences, Beijing 100190, China; jiaji@iccas.ac.cn

\* Correspondence: baoyi.yu@bua.edu.cn; Tel.: +86-13511066021

**Table S1.** Crystal data and structure refinement details for CP-1 and CP-2.

| CDC No.                                   | 2133163                                                                        | 2133166                                                                      |
|-------------------------------------------|--------------------------------------------------------------------------------|------------------------------------------------------------------------------|
| Formula                                   | C <sub>50</sub> H <sub>37</sub> N <sub>8</sub> O <sub>17</sub> Zn <sub>7</sub> | C <sub>77</sub> H <sub>71</sub> N <sub>5</sub> O <sub>7</sub> Zn             |
| Formula weight                            | 1067.57                                                                        | 592.86                                                                       |
| Temperature/K                             | 150.0(1)                                                                       | 150.0(1)                                                                     |
| Crystal system                            | monoclinic                                                                     | monoclinic                                                                   |
| Space group                               | P2 <sub>1</sub> /n                                                             | P2 <sub>1</sub> /n                                                           |
| <i>a</i> / Å                              | 9.5028(7)                                                                      | 13.143(1)                                                                    |
| <i>b</i> / Å                              | 35.052(3)                                                                      | 14.443(1)                                                                    |
| <i>c</i> / Å                              | 13.407(1)                                                                      | 14.014(1)                                                                    |
| $\alpha$ / °                              | 90                                                                             | 90                                                                           |
| $\beta$ / °                               | 95.583(3)                                                                      | 97.600(4)                                                                    |
| $\gamma$ / °                              | 90                                                                             | 90                                                                           |
| <i>V</i> / Å <sup>3</sup>                 | 4444.4(6)                                                                      | 2636.8(5)                                                                    |
| <i>Z</i>                                  | 4                                                                              | 4                                                                            |
| $\rho_{\text{calc}}$ [g/cm <sup>3</sup> ] | 1.595                                                                          | 1.493                                                                        |
| $\mu$ / mm <sup>-1</sup>                  | 1.158                                                                          | 0.987                                                                        |
| F(000)                                    | 2176.0                                                                         | 1216.0                                                                       |
| Crystal size / mm <sup>3</sup>            | 0.23 × 0.21 × 0.2                                                              | 0.27 × 0.21 × 0.19                                                           |
| Radiation                                 | MoK $\alpha$ ( $\lambda$ = 0.71073)                                            | MoK $\alpha$ ( $\lambda$ = 0.71073)                                          |
| 2 $\theta$ range for data collection / °  | 4.424 to 52.892                                                                | 3.994 to 52.776                                                              |
| Index ranges                              | -11 ≤ <i>h</i> ≤ 11, -43 ≤ <i>k</i> ≤ 16, -18 ≤ <i>l</i> ≤ 16                  | -16 ≤ <i>h</i> ≤ 16, -18 ≤ <i>k</i> ≤ 17, -17 ≤ <i>l</i> ≤ 17                |
| Reflections collected                     | 34195                                                                          | 25800                                                                        |
| Independent reflections                   | 9040 [ <i>R</i> <sub>int</sub> = 0.0677, <i>R</i> <sub>sigma</sub> = 0.0647]   | 5398 [ <i>R</i> <sub>int</sub> = 0.0857, <i>R</i> <sub>sigma</sub> = 0.0695] |
| Data/restraints/parameters                | 9040/0/651                                                                     | 5398/0/366                                                                   |
| Goodness-of-fit on <i>F</i> <sup>2</sup>  | 1.038                                                                          | 1.042                                                                        |

Final  $R$  indexes [ $I \geq 2\sigma(I)$ ]<sup>a</sup>  $R_1 = 0.0432$ ,  $wR_2 = 0.0843$   $R_1 = 0.0431$ ,  $wR_2 = 0.0855$   
 Final  $R$  indexes [all data]<sup>b</sup>  $R_1 = 0.0762$ ,  $wR_2 = 0.0997$   $R_1 = 0.0757$ ,  $wR_2 = 0.0981$   
 Largest diff. peak/hole / e Å<sup>-3</sup> 1.21/-0.43 0.40/-0.41

<sup>a</sup>  $R_1 = \Sigma |F_o| - |F_c| / \Sigma |F_o|$ ; [b]  $wR_2 = [\Sigma (w(F_o^2 - F_c^2)^2) / \Sigma (F_o^2)]^{1/2}$ .

**Table S2.** The selected bond lengths [Å] and angles [°] for CP-1.

|                                        |           |             |          |             |          |             |          |
|----------------------------------------|-----------|-------------|----------|-------------|----------|-------------|----------|
| Zn1-O8 <sup>#1</sup>                   | 1.939(2)  | N1-C20      | 1.379(4) | C6-C8       | 1.496(4) | C13-C12     | 1.391(4) |
| Zn1-O12                                | 1.934(2)  | O10-C18     | 1.206(4) | C6-C5       | 1.392(4) | C13-C18     | 1.484(4) |
| Zn1-N4                                 | 2.032(3)  | O7C17       | 1.226(4) | C10-C11     | 1.509(4) | C27-C28     | 1.409(4) |
| Zn1-N5                                 | 2.026(3)  | N8-C48      | 1.320(4) | C20-C21     | 1.345(4) | C27-C22     | 1.417(4) |
| Zn2-O5 <sup>#2</sup>                   | 1.964(2)  | N8-C49      | 1.395(5) | C16-C11     | 1.390(4) | C24-C23     | 1.408(4) |
| Zn2-O1                                 | 1.942(2)  | N2-C19      | 1.343(4) | C16-C15     | 1.392(4) | C22-C23     | 1.356(5) |
| Zn2-N1                                 | 2.016(3)  | N2-C22      | 1.443(4) | C4-C5       | 1.391(4) | C30-C31     | 1.361(5) |
| Zn2-N8 <sup>#3</sup>                   | 2.043(3)  | N2-C21      | 1.381(4) | C4-C3       | 1.387(4) | C42-C41     | 1.417(5) |
| O8-C17                                 | 1.270(4)  | N3-C32      | 1.342(4) | C4-C9       | 1.490(4) | C42-C43     | 1.429(5) |
| O5-C8                                  | 1.267(4)  | N3-C25      | 1.445(4) | C1-C2       | 1.502(4) | C42-C47     | 1.420(5) |
| O4-C9                                  | 1.208(4)  | N3-C34      | 1.373(4) | C14-C15     | 1.388(4) | C38-C43     | 1.425(5) |
| O12-C10                                | 1.285(4)  | N5-C35      | 1.321(4) | C14-C13     | 1.395(4) | C38-C39     | 1.356(5) |
| O1-C1                                  | 1.283(4)  | N5-C36      | 1.372(5) | C25-C26     | 1.418(4) | C49-C50     | 1.352(5) |
| O2-C1                                  | 1.230(4)  | N7-C48      | 1.353(4) | C25-C24     | 1.365(4) | C41-C40     | 1.357(5) |
| O11-C10                                | 1.227(4)  | N7-C41      | 1.446(4) | C11-C12     | 1.388(4) | C43-C44     | 1.416(5) |
| O6-C8                                  | 1.243(4)  | N7-C50      | 1.384(4) | C29-C28     | 1.362(4) | C36-C37     | 1.352(5) |
| N4-C32                                 | 1.315(4)  | N6-C35      | 1.339(4) | C29-C30     | 1.411(5) | C33-C34     | 1.354(5) |
| N4-C33                                 | 1.377(4)  | N6-C38      | 1.449(4) | C2-C3       | 1.389(4) | C40-C39     | 1.407(5) |
| O9-C18                                 | 1.314(4)  | N6-C37      | 1.375(5) | C17-C15     | 1.501(4) | C44-C45     | 1.368(5) |
| O3-C9                                  | 1.325(4)  | C7-C6       | 1.391(4) | C26-C27     | 1.438(4) | C46-C47     | 1.356(5) |
| N1-C19                                 | 1.325(4)  | C7-C2       | 1.388(4) | C26-C31     | 1.410(4) | C46-C45     | 1.404(5) |
| O8 <sup>#1</sup> -Zn1-N4               | 113.04(1) | C36-N5-Zn1  | 127.9(2) | O4-C9-C4    | 124.7(3) | O2-C1-C2    | 120.2(3) |
| O8 <sup>#1</sup> -Zn1-N5               | 121.23(1) | C48-N7-C41  | 125.8(3) | O3-C9-C4    | 111.1(3) | C15-C14-C13 | 120.3(3) |
| O12-Zn1-O8 <sup>#1</sup>               | 118.16(9) | C48-N7-C50  | 107.7(3) | C25-C24-C23 | 119.0(3) | C26-C25-N3  | 119.1(3) |
| O12-Zn1-N4                             | 98.65(1)  | C50-N7-C41  | 126.5(3) | C27-C22-N2  | 118.9(3) | C24-C25-N3  | 118.1(3) |
| O12-Zn1-N5                             | 105.23(1) | C35-N6-C38  | 123.9(3) | C23-C22-N2  | 118.5(3) | C24-C25-C26 | 122.7(3) |
| N5-Zn1-N4                              | 96.22(1)  | C35N637     | 106.9(3) | C23-C22-C27 | 122.6(3) | C22-C23-C24 | 120.3(3) |
| O5 <sup>#2</sup> -Zn2-N1               | 120.13(1) | C4-C5-C6    | 119.9(3) | C20-C21-N2  | 105.8(3) | C41-C42-C43 | 118.6(3) |
| O5 <sup>#2</sup> -Zn2-N8 <sup>#3</sup> | 105.79(1) | C16-C11-C10 | 121.4(3) | C31-C30-C29 | 120.3(3) | C41-C42-C47 | 123.6(3) |
| O1-Zn2-O5 <sup>#2</sup>                | 112.91(9) | C12-C11-C10 | 119.1(3) | O9-C18-C13  | 113.0(3) | C47-C42-C43 | 117.8(3) |
| O1-Zn2-N1                              | 98.56(1)  | C12-C11-C16 | 119.4(3) | O10-C18-O9  | 123.0(3) | C39-C38-N6  | 117.8(3) |
| O1-Zn2-N8 <sup>#3</sup>                | 116.37(1) | C28-C29-C30 | 119.9(3) | O10-C18-C13 | 124.0(3) | C43-C38-N6  | 119.9(3) |
| N1-Zn2-N8 <sup>#3</sup>                | 103.23(1) | C7-C2-C1    | 120.6(3) | N5-C35-N6   | 111.4(3) | C39-C38-C43 | 122.3(3) |
| C17-O8-Zn1 <sup>#2</sup>               | 116.88(2) | C3-C2-C7    | 119.1(3) | C37-N6-C38  | 129.1(3) | C50-C49-N8  | 110.2(3) |
| C8-O5-Zn2 <sup>#1</sup>                | 110.55(2) | C3-C2-C1    | 120.3(3) | C2-C7-C6    | 120.7(3) | C42-C41-N7  | 119.4(3) |
| C10-O12-Zn1                            | 120.3(2)  | O8-C17-C15  | 116.7(3) | C7-C6-C8    | 119.8(3) | C40-C41-N7  | 118.6(3) |
| C1-O1-Zn2                              | 115.4(2)  | O7-C17-O8   | 123.3(3) | C7-C6-C5    | 119.6(3) | C40-C41-C42 | 122.0(3) |
| C32-N4-Zn1                             | 122.2(2)  | O7-C17-C15  | 120.0(3) | C5-C6-C8    | 120.6(3) | C38-C43-C42 | 117.3(3) |

|                          |          |             |          |             |          |             |          |
|--------------------------|----------|-------------|----------|-------------|----------|-------------|----------|
| C32-N4-C33               | 106.3(3) | C4-C3-C2    | 120.8(3) | O12-C10-C11 | 115.0(3) | C44-C43-C42 | 119.2(3) |
| C33-N4-Zn1               | 131.5(2) | C16-C15-C17 | 120.7(3) | O11-C10-O12 | 125.3(3) | C44-C43-C38 | 123.6(3) |
| C19-N1-Zn2               | 120.7(2) | C14-C15-C16 | 119.4(3) | O11-C10-C11 | 119.7(3) | C37-C36-N5  | 109.2(3) |
| C19-N1-C20               | 106.0(3) | C14-C15-C17 | 119.6(3) | N1-C19-N2   | 110.4(3) | C30-C31-C26 | 121.7(3) |
| C20-N1-Zn2               | 132.6(2) | C25-C26-C27 | 117.8(3) | C21-C20-N1  | 109.9(3) | C49-C50-N7  | 105.6(3) |
| C48-N8-Zn2 <sup>#4</sup> | 124.8(2) | C31-C26-C25 | 124.5(3) | N4-C32-N3   | 111.1(3) | C34-C33-N4  | 109.0(3) |
| C48-N8-C49               | 105.3(3) | C31-C26-C27 | 117.8(3) | N8-C48-N7   | 111.2(3) | C33-C34-N3  | 106.4(3) |
| C49-N8-Zn2 <sup>#4</sup> | 124.1(2) | C14-C13-C18 | 121.3(3) | C11-C16-C15 | 120.7(3) | C41-C40-C39 | 119.9(4) |
| C19-N2-C22               | 124.0(3) | C12-C13-C14 | 119.6(3) | O5-C8-C6    | 118.1(3) | C38-C39-C40 | 120.0(3) |
| C19-N2-C21               | 107.9(3) | C12-C13-C18 | 119.1(3) | O6-C8-O5    | 122.9(3) | C36-C37-N6  | 106.6(3) |
| C21-N2-C22               | 128.1(3) | C11-C12-C13 | 120.5(3) | O6-C8-C6    | 119.0(3) | C45-C44-C43 | 120.6(4) |
| C32-N3-C25               | 127.5(3) | C28-C27-C26 | 118.9(3) | C5-C4-C9    | 118.9(3) | C47-C46-C45 | 120.3(4) |
| C32-N3-C34               | 107.2(3) | C28-C27-C22 | 123.5(3) | C3-C4-C5    | 119.8(3) | C46-C47-C42 | 121.7(4) |
| C34-N3-C25               | 125.3(3) | C22-C27-C26 | 117.6(3) | C3-C4-C9    | 121.3(3) | C44-C45-C46 | 120.4(4) |
| C35-N5-Zn1               | 121.5(2) | C29-C28-C27 | 121.3(3) | O1-C1-C2    | 114.9(3) |             |          |
| C35-N5-C36               | 105.9(3) | O4-C9-O3    | 124.2(3) | O2-C1-O1    | 124.9(3) |             |          |

Symmetry transformation: <sup>#1</sup>-1 + x, y, z; <sup>#2</sup>1 + x, y, z; <sup>#3</sup>1 + x, y, -1 + z; <sup>#4</sup>-1 + x, y, 1 + z.

**Table S3.** The selected bond lengths [Å] and angles [°] for CP-2.

|                                        |           |            |          |             |          |             |          |
|----------------------------------------|-----------|------------|----------|-------------|----------|-------------|----------|
| Zn1-O5 <sup>#1</sup>                   | 1.942(2)  | N1-C11     | 1.379(4) | C7-C2       | 1.385(4) | C17-C18     | 1.428(4) |
| Zn1-O1                                 | 1.942(2)  | N4-C25     | 1.383(4) | C7-C6       | 1.395(4) | C17-C22     | 1.419(4) |
| Zn1-N1                                 | 2.004(2)  | N4-C23     | 1.320(3) | C4-C5       | 1.384(4) | C14-C15     | 1.409(4) |
| Zn1-N4 <sup>#2</sup>                   | 2.018(2)  | N3-C16     | 1.444(3) | C4-C3       | 1.397(4) | C18-C19     | 1.417(4) |
| O5-C8                                  | 1.285(3)  | N3-C24     | 1.380(3) | C2-C3       | 1.392(4) | C24-C25     | 1.351(4) |
| O6-C8                                  | 1.246(3)  | N3-C23     | 1.335(4) | C2-C1       | 1.510(4) | C12-C11     | 1.352(4) |
| O1-C1                                  | 1.284(3)  | N2-C13     | 1.446(3) | C16-C17     | 1.421(4) | C19-C20     | 1.364(5) |
| O3-C9                                  | 1.325(3)  | N2-C12     | 1.383(3) | C16-C15     | 1.352(4) | C22-C21     | 1.357(4) |
| O4-C9                                  | 1.207(3)  | N2-C10     | 1.336(4) | C6-C5       | 1.391(4) | C20-C21     | 1.406(4) |
| O2-C1                                  | 1.234(3)  | C8-C6      | 1.499(4) | C13-C14     | 1.361(4) | C26-C27     | 1.444(5) |
| N1-C10                                 | 1.327(3)  | C9-C4      | 1.496(4) | C13-C18     | 1.413(4) | N5-C27      | 1.131(5) |
| O5 <sup>#1</sup> -Zn1-N1               | 125.44(9) | C12-N2-C13 | 127.3(2) | C15-C16-N3  | 118.8(3) | C13-C18-C17 | 117.7(3) |
| O5 <sup>#1</sup> -Zn1-N4 <sup>#2</sup> | 105.53(9) | C10-N2-C13 | 124.8(2) | C15-C16-C17 | 123.1(3) | C13-C18-C19 | 123.6(3) |
| O1-Zn1-O5 <sup>#1</sup>                | 109.59(8) | C10-N2-C12 | 107.7(2) | C7-C6-C8    | 118.7(2) | C19-C18-C17 | 118.7(3) |
| O1-Zn1-N1                              | 110.60(9) | O5-C8-C6   | 116.4(2) | C5-C6-C8    | 122.1(2) | C16-C15-C14 | 119.2(3) |
| O1-Zn1-N4 <sup>#2</sup>                | 97.50(9)  | O6-C8-O5   | 122.7(3) | C5-C6-C7    | 119.1(3) | C25-C24-N3  | 105.7(3) |
| N1-Zn1-N4 <sup>#2</sup>                | 104.13(1) | O6-C8-C6   | 120.8(2) | C4-C5-C6    | 120.5(2) | C11-C12-N2  | 106.0(3) |
| C8-O5-Zn1 <sup>#3</sup>                | 109.92(2) | O3-C9-C4   | 112.6(2) | C2-C3-C4    | 119.7(3) | C24-C25-N4  | 109.9(2) |
| C1-O1-Zn1                              | 119.06(2) | O4-C9-O3   | 123.6(3) | O1-C1-C2    | 114.7(3) | N1-C10-N2   | 110.8(3) |
| C10-N1-Zn1                             | 122.4(2)  | O4-C9-C4   | 123.7(3) | O2-C1-O1    | 124.9(2) | N4-C23-N3   | 111.5(3) |
| C10-N1-C11                             | 106.0(2)  | C2-C7-C6   | 120.7(3) | O2-C1-C2    | 120.3(2) | C20-C19-C18 | 120.6(3) |
| C11-N1-Zn1                             | 128.81(2) | C5-C4-C9   | 119.2(2) | C14-C13-N2  | 117.6(3) | C12-C11-N1  | 109.5(2) |
| C25-N4-Zn1 <sup>#4</sup>               | 127.93(2) | C5-C4-C3   | 120.0(3) | C14-C13-C18 | 122.8(3) | C21-C22-C17 | 120.8(3) |
| C23-N4-Zn1 <sup>#4</sup>               | 126.4(2)  | C3-C4-C9   | 120.8(3) | C18-C13-N2  | 119.6(3) | C19-C20-C21 | 120.7(3) |
| C23-N4-C25                             | 105.4(2)  | C7-C2-C3   | 119.8(2) | C16-C17-C18 | 117.5(3) | C22-C21-C20 | 120.5(3) |

|            |          |            |          |             |          |            |          |
|------------|----------|------------|----------|-------------|----------|------------|----------|
| C24-N3-C16 | 129.2(2) | C7-C2-C1   | 119.7(2) | C22-C17-C16 | 123.8(3) | N5-C27-C26 | 178.7(5) |
| C23-N3-C16 | 123.1(2) | C3-C2-C1   | 120.5(3) | C22-C17-C18 | 118.7(3) |            |          |
| C23-N3-C24 | 107.6(2) | C17-C16-N3 | 118.0(3) | C13-C14-C15 | 119.4(3) |            |          |

Symmetry transformation:  $^{\#1} -1/2 + x, 3/2 - y, -1/2 + z$ ;  $^{\#2} 3/2 - x, 1/2 + y, 1/2 - z$ ;  $^{\#3} 1/2 + x, 3/2 - y, 1/2 + z$ ;  $^{\#4} 3/2 - x, -1/2 + y, 1/2 - z$ .

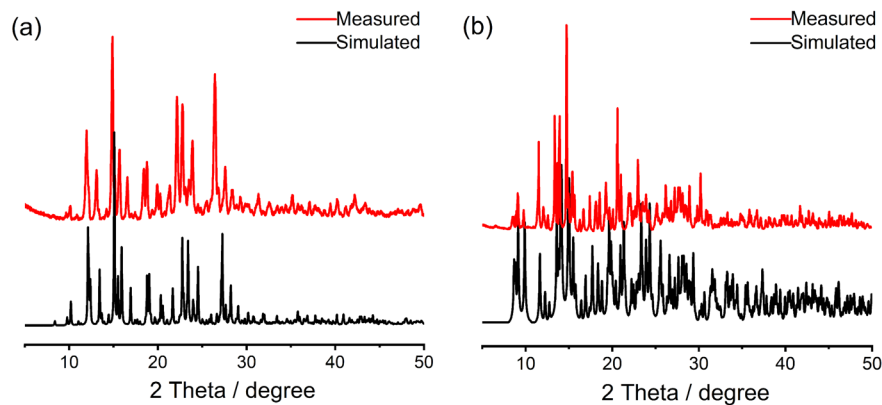

**Figure S1.** PXRD patterns of simulated and as-synthesized CP-1 and CP-2.

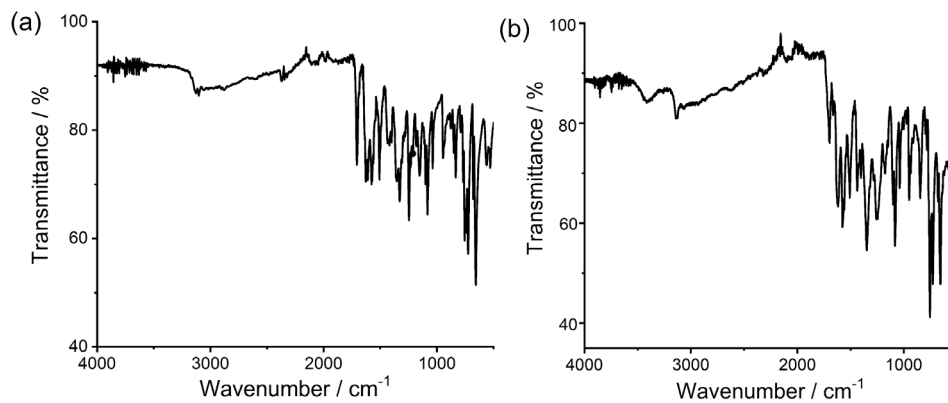

**Figure S2.** FT-IR spectra of CP-1 and CP-2.

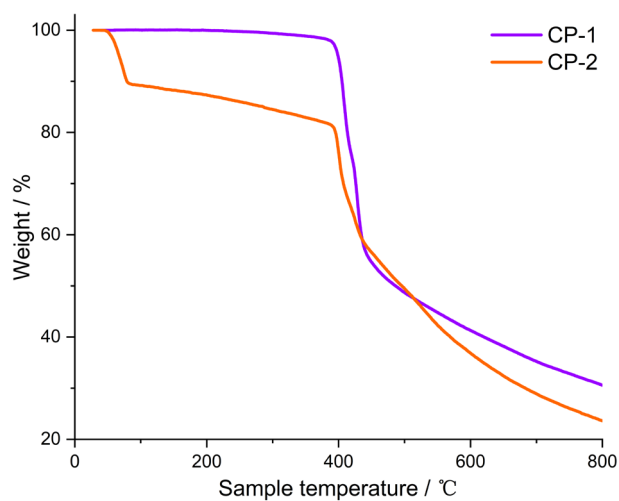

**Figure S3.** TGA spectra of CP-1 and CP-2.

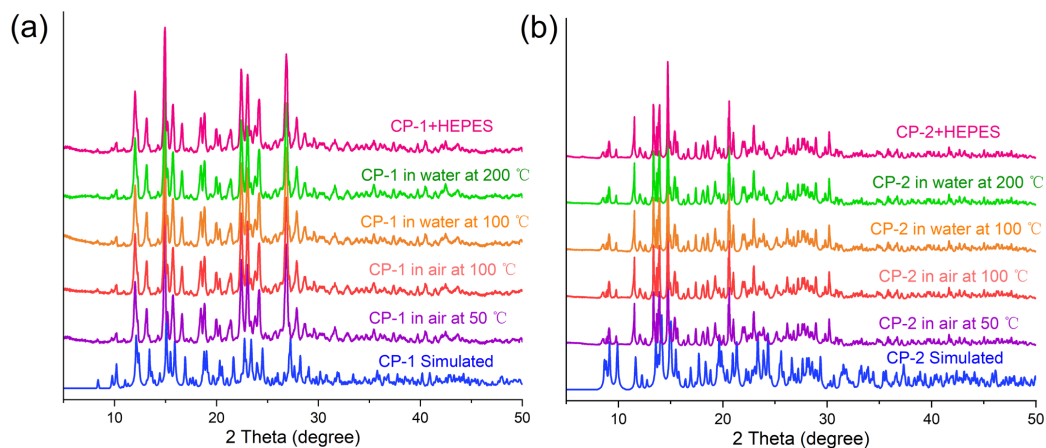

**Figure S4.** PXRD patterns of CP-1 (a) and CP-2 (b) under different conditions.

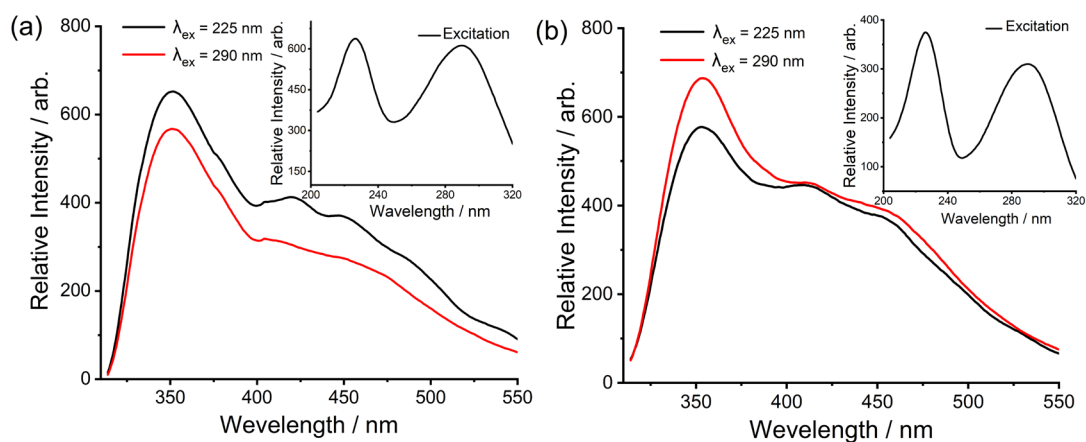

**Figure S5.** Fluorescence spectra of CP-1 (a) and CP-2 (b) in aqueous suspension at r.t.: excitation (insert) and emission.

#### *pH sensing*

To determine a wide range of pH values in aqueous solutions, the ability of the samples was explored. In fluorescence spectra obtained after the gradual addition of sodium hydroxide or concentrated hydrogen chloride to the solution. Interestingly, the fluorescence intensity and maximum emission of CP-1 are closely related to the pH value of the dispersed solution. The fluorescence emission intensity of CP-1 was quenched in the range of pH = 6.2–12.0 (Figure S6) and the maximum emission intensity was linearly dependent on pH in the range of pH = 6.2–12.0. Thus, CP-1 may have the potential ability to quantitatively detect pH values in the range of 6.2–12.0 in aqueous media.

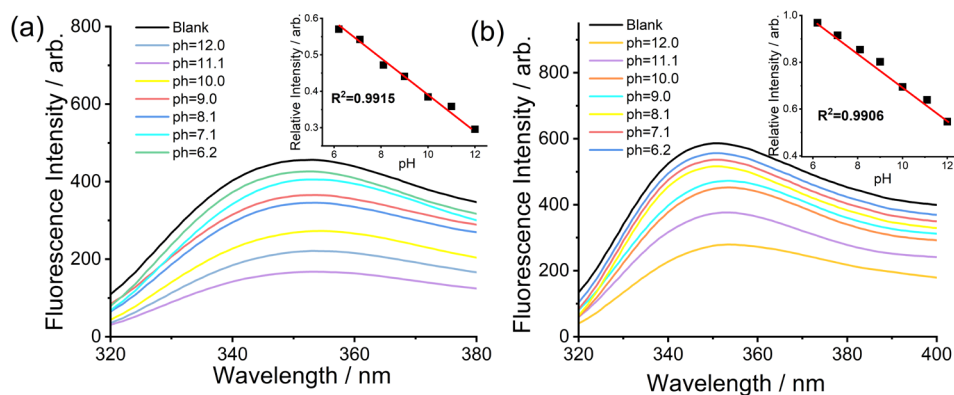

**Figure S6.** pH-dependent fluorescence and linear variation (insert); (a) excitation of 225 nm (b) excitation of 290 nm.

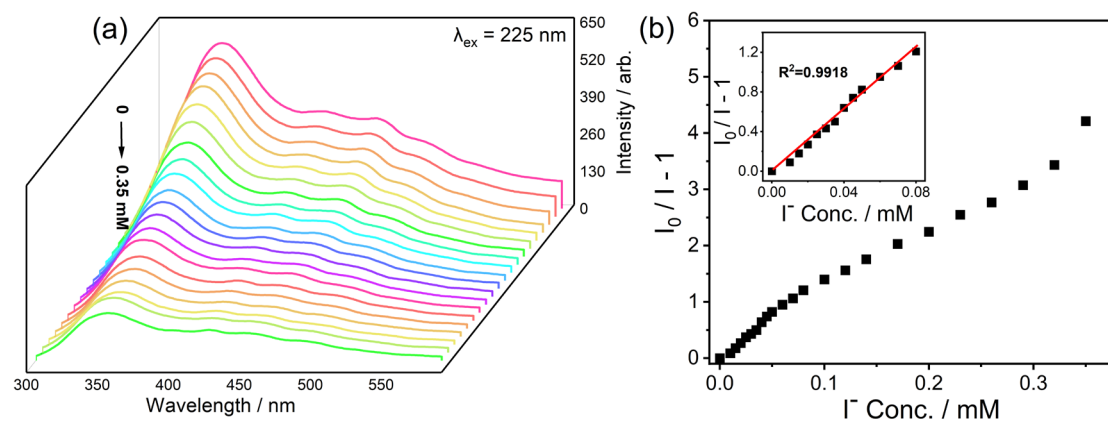

**Figure S7.** Fluorescence intensities of CP-1 (a) dispersed in different concentrations of  $I^-$ ; the plot of  $I_0/I - 1$  of CP-1; (b) vs. concentration of  $I^-$  in aqueous solution (pH = 7.0) at 225 nm (Insert: The plot of  $I_0/I - 1$  of the CPs with the concentration over a  $I^-$  concentration range of 0-0.1 mM in aqueous solution).

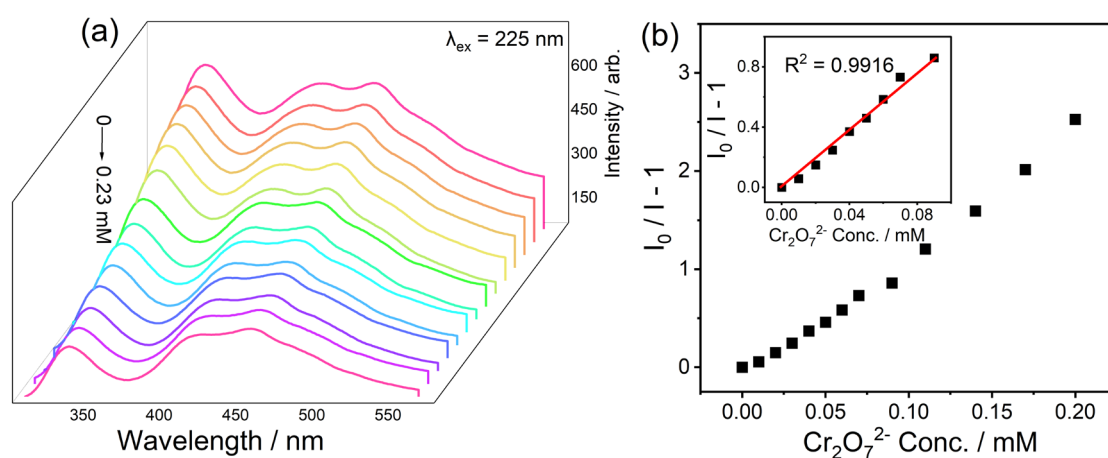

**Figure S8.** Fluorescence intensities of CP-1 (a) dispersed in different concentrations of  $Cr_2O_7^{2-}$ ; the plot of  $I_0/I - 1$  of CP-1; (b) vs. concentration of  $Cr_2O_7^{2-}$  in aqueous solution (pH = 7.0) at 225 nm (Insert: The plot of  $I_0/I - 1$  of the CPs with the concentration over a  $Cr_2O_7^{2-}$  concentration range of 0 - 0.09 mM in aqueous solution).

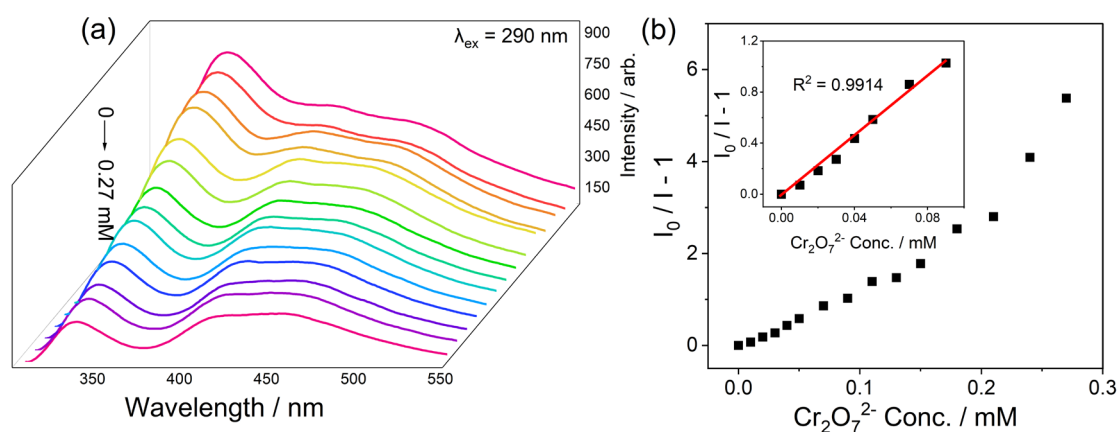

**Figure S9.** Fluorescence intensities of CP-1 (a) dispersed in different concentrations of  $Cr_2O_7^{2-}$ ; the plot of  $I_0/I - 1$  of CP-1 (b) vs. concentration of  $Cr_2O_7^{2-}$  in aqueous solution (pH = 7.0) at 290 nm (Insert: The plot of  $I_0/I - 1$  of the CPs with the concentration over a  $Cr_2O_7^{2-}$  concentration range of 0 – 0.09 mM in aqueous solution).

| Sensor | Analyte | Excitation / nm | Emission / nm | Concentration / mg·mL <sup>-1</sup> | Linear range / $\mu$ M | LOD / $\mu$ M | K <sub>SV</sub> × 10 <sup>4</sup> / M <sup>-1</sup> |
|--------|---------|-----------------|---------------|-------------------------------------|------------------------|---------------|-----------------------------------------------------|
| CP-1   | $I^-$   | 225             | 350           | 0.2                                 | 0-80                   | 0.33          | 2.16                                                |

**Table S4.** Ksv of CP-1 for ions

| Sensor | Analyte                                      | Excitation / nm | Emission / nm | Concentration / mg·mL <sup>-1</sup> | Linear range / $\mu$ M | LOD / $\mu$ M | Ksv $\times 10^4$ / M <sup>-1</sup> |
|--------|----------------------------------------------|-----------------|---------------|-------------------------------------|------------------------|---------------|-------------------------------------|
| CP-1   | Cr <sub>2</sub> O <sub>7</sub> <sup>2-</sup> | 225             | 350           | 0.2                                 | 0-90                   | 0.50          | 1.08                                |
| CP-1   |                                              | 290             | 350           | 0.2                                 | 0-90                   | 0.44          | 1.21                                |

and LOD values detection.

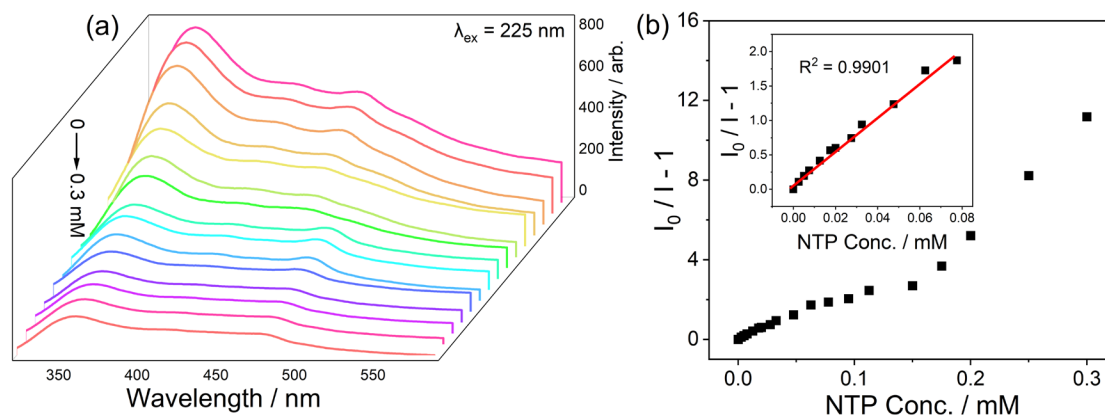

**Figure S10.** Fluorescence intensities of CP-1 (a) dispersed in different concentrations of NTP; the plot of  $I_0/I - 1$  of CP-1 (b) vs. concentration of NTP in aqueous solution (pH = 7.0) at 225 nm (Insert: The plot of  $I_0/I - 1$  of the CPs with the concentration over a NTP concentration range of 0 - 0.08 mM in aqueous solution).

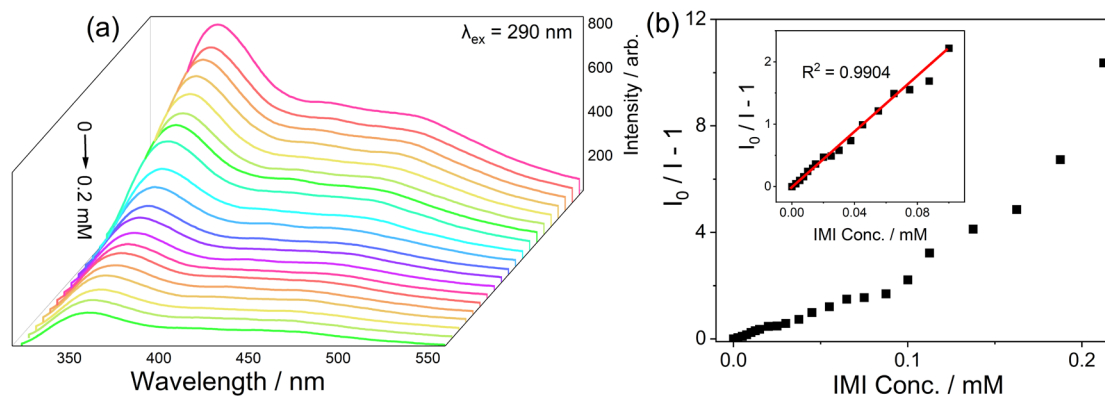

**Figure S11.** Fluorescence intensities of CP-1 (a) dispersed in different concentrations of IMI; the plot of  $I_0/I - 1$  of CP-1 (b) vs. concentration of IMI in aqueous solution (pH = 7.0) at 290 nm (Insert: The plot of  $I_0/I - 1$  of the CPs with the concentration over a IMI concentration range of 0 - 0.08 mM in aqueous solution).

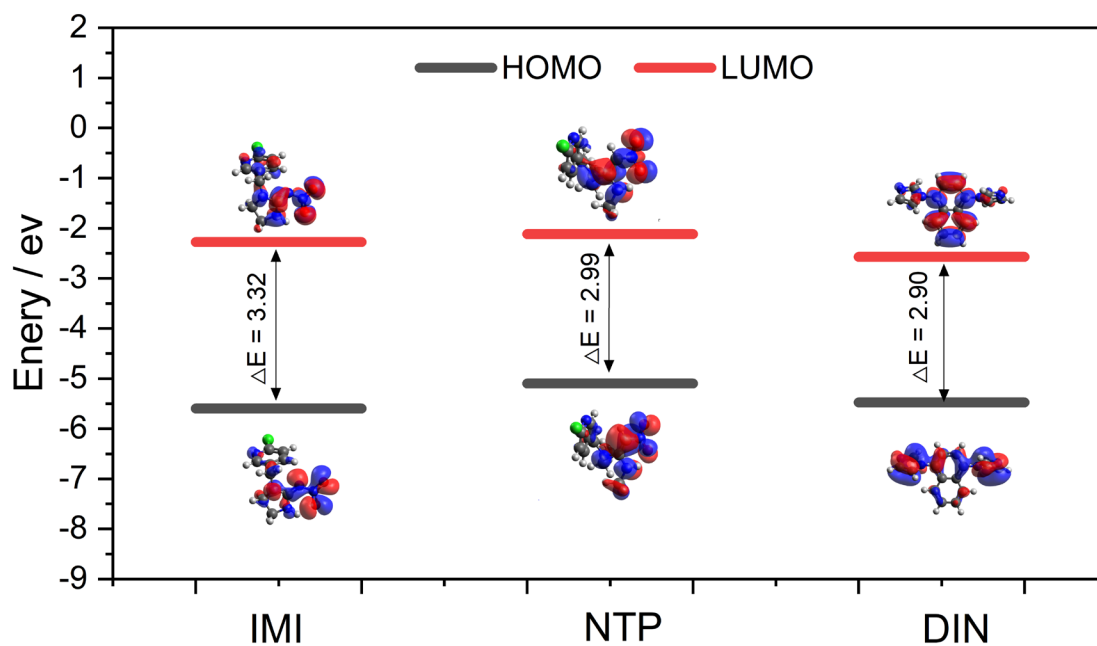

**Figure S12.** The calculated HOMO and LUMO energy levels of DIN ligand, IMI and NTP.

**Table S5.** Chemical structures of the selected pesticides.

| Name (abbreviation)                    | Chemical structure                                                                    |
|----------------------------------------|---------------------------------------------------------------------------------------|
| Carbendazim (CAR)                      | 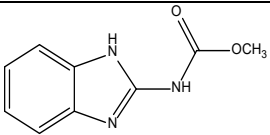    |
| Dipterex (DIP)                         |    |
| Glyphosate (GLY)                       |     |
| Imidacloprid (IMI)                     |     |
| Imazalil (IMZ)                         |     |
| Metamitron (MMT)                       |   |
| Nitenpyram (NTP)                       |   |
| Pentachloro-nitrobenzene (PCNB)        |  |
| Chlorothalonil (TPN)                   |  |
| Thiophanate-methyl (TPM)               |   |
| 2,4-dichlorophenoxyacetic acid (2,4-D) |   |

**Table S6.** Ksv and LOD values for recently reported Zn-MOF-based luminescence probes for sensing of NTP and IMI.



| Sensor                                                                                                                     | $\lambda_{\text{ex}}$ / nm | $\lambda_{\text{em}}$ / nm | Analyte | Concentration / $\text{mg} \cdot \text{mL}^{-1}$ | Linear range / $\mu\text{M}$ | LOD / $\mu\text{M}$ | $K_{\text{sv}} \times 10^4 / \text{M}^{-1}$ | Ref.      |
|----------------------------------------------------------------------------------------------------------------------------|----------------------------|----------------------------|---------|--------------------------------------------------|------------------------------|---------------------|---------------------------------------------|-----------|
| CP-1                                                                                                                       | 225                        | 350                        | NTP     | 0.1                                              | 0-80                         | 0.28                | 3.06                                        | This work |
| [Tb(PMBB) <sub>1.5</sub> (H <sub>2</sub> O) <sub>2</sub> ]                                                                 | 280                        | 545                        |         | 1.0                                              | 0-100                        | 0.71                | 1.10                                        | [1]       |
| [Eu(PMBB) <sub>1.5</sub> (H <sub>2</sub> O) <sub>2</sub> ]                                                                 | 280                        | 614                        |         | 1.0                                              | 0-100                        | 0.77                | 0.99                                        | [1]       |
| [Cd(NIP) <sub>2</sub> (DTP)(H <sub>2</sub> O) <sub>2</sub> ] · H <sub>2</sub> O                                            | 250, 290                   | 322                        |         | 0.1                                              | 0-50                         | 0.41                | 1.87                                        | [2]       |
| [Cd(NTP) <sub>2</sub> (DTP)(Et)(H <sub>2</sub> O) <sub>2</sub> ] · (H <sub>2</sub> O) <sub>0.5</sub>                       | 250, 290                   | 322                        |         | 0.1                                              | 0-50                         | 0.43                | 1.79                                        | [2]       |
| [Cd <sub>3</sub> (BTC) <sub>2</sub> (DTP)(H <sub>2</sub> O) <sub>6</sub> ] · (H <sub>2</sub> O) <sub>2.5</sub>             | 248, 280                   | 322                        |         | 0.1                                              | 0-60                         | 0.27                | 3.45                                        | [3]       |
| CP-1                                                                                                                       | 290                        | 350                        | IMI     | 0.08                                             | 0-90                         | 0.25                | 2.91                                        | This work |
| [Zn <sub>3</sub> (BTC) <sub>2</sub> (DTP) <sub>4</sub> (H <sub>2</sub> O) <sub>2</sub> ] · (H <sub>2</sub> O) <sub>4</sub> | 258                        | 322                        |         | 0.1                                              | 0-50                         | 0.35                | 2.16                                        | [4]       |
| [Zn <sub>2</sub> (NTD) <sub>2</sub> (DTP)]                                                                                 | 258                        | 322                        |         | 0.1                                              | 0-50                         | 0.31                | 2.49                                        | [4]       |

1. Zhou, Z. D.; Wang, C. Y.; Zhu, G. S.; Du, B.; Yu, B. Y.; Wang, C. C., Water-stable europium(III) and terbium(III)-metal organic frameworks as fluorescent sensors to detect ions, antibiotics and pesticides in aqueous solutions. *J. Mol. Struct.* **2022**, *1251*, 132009-132019.
2. Zhou, Z.; Li, S.; Wang, W.; Ma, D.; Zhao, H.; Jia, L.; Jia, Y.; Yu, B., Two bis-color excited luminescent sensors of two-dimensional Cd(II)-MOFs bearing mixed ligands for detection of ions and pesticides in aqueous solutions. *J. Mol. Struct.* **2023**, *1273*, 134310-134318.
3. Zhu, G. S.; Cheng, S. L.; Zhou, Z. D.; Du, B.; Shen, Y. Y.; Yu, B. Y., Bisligand-coordinated cadmium organic frameworks as fluorescent sensors to detect ions, antibiotics and pesticides in aqueous solutions. *Polyhedron* **2022**, *217*, 115759-115769.
4. Zhou, Z. D.; Li, S. Q.; Liu, Y.; Du, B.; Shen, Y. Y.; Yu, B. Y.; Wang, C. C., Two bis-ligand-coordinated Zn(II)-MOFs for luminescent sensing of ions, antibiotics and pesticides in aqueous solutions. *RSC Adv.* **2022**, *12*, 7780-7788.
